# Supplementary material for: Effect of Mangrove on Nitrogen Removal in the Intertidal Zone of Shenzhen’s Deep Bay: From 15N Isotope Tracing to Microbial Analysis
Source: MDPI journal article supplement (doi:10.3390/w14213507), 2022-11-02
Supplement: s1 [file s1]

## Supplementary Materials

### **Effect of mangrove on nitrogen removal in the intertidal zone of Shenzhen's Deep Bay: From $^{15}\text{N}$ isotope tracing to microbial analysis**

Xinwei Jin<sup>a,c</sup>, Jingjing Fu<sup>a</sup>, Juan Yang<sup>a</sup>, Jing Guo<sup>a</sup>, Wenrui Guo<sup>\*,a,b</sup>, Yahui Chen<sup>a,d</sup>

<sup>a</sup> *PowerChina Huadong Engineering Corporation Limited, Hangzhou 311122, China*

<sup>b</sup> *School of Environment, Tsinghua University, Beijing 100084, China*

<sup>c</sup> *College of Oceanography, Hohai University, Nanjing 210098, China*

<sup>d</sup> *PowerChina Eco-environmental Group Co., Ltd, Shenzhen 518100, China*

*\* Corresponding author. Present address: No.201 Gaojiao Road, Yuhang District, Hangzhou 311122, China. Tel: +86 (0) 571-56627914. E-mail address: guo\_wr@hdec.com (W. Guo).*

**The following are included as additional supplementary materials for this paper:**

**Page S3:** Section S1. Calculation methods of potential rates of denitrification, anammox, and DNRA.

**Page S4:** Section S2. Analysis of bacterial community by 454 high-throughput 16S rRNA gene pyrosequencing.

**Page S5:** Figure S1 Accumulation of  $^{29}\text{N}_2$  and  $^{30}\text{N}_2$  in soil slurries spiked with  $100\ \mu\text{M}$   $^{15}\text{NO}_3^-$  at Sites KC (a), BG (b), SA (c), AC (d), and MF (e).

## Section S1. Calculation methods of potential rates of denitrification, anammox, and DNRA

Both anammox and denitrification generated  $^{29}\text{N}_2$ ; thus, the respective contributions of each process to the total  $^{29}\text{N}_2$  production were quantified by Eq. (S1):

$$P_{29} = A_{29} + D_{29} \quad (\text{S1})$$

where,  $P_{29}$ ,  $A_{29}$ , and  $D_{29}$  ( $\mu\text{mol}/(\text{kg}\cdot\text{h})$ ) represent the total  $^{29}\text{N}_2$  production rate, the  $^{29}\text{N}_2$  production rate from anammox, and the  $^{29}\text{N}_2$  production rate from denitrification, respectively. Because the  $^{28}\text{N}_2$ ,  $^{29}\text{N}_2$ , and  $^{30}\text{N}_2$  generated from denitrification follow random isotope pairing,  $D_{29}$  can also be estimated by Eq. (S1):

$$D_{29} = 2 \times P_{30} \times (1 - F_n) \times F_n^{-1} \quad (\text{S2})$$

where  $P_{30}$  ( $\mu\text{mol}/(\text{kg}\cdot\text{h})$ ) is the total  $^{30}\text{N}_2$  production rate, and  $F_n$  is the mole fraction of  $^{15}\text{N}_2$  in the nitrate pool, which can be calculated by the measured concentrations of nitrate before and after the addition of  $^{15}\text{NO}_3^-$ . Consequently, the potential rates of anammox and denitrification were estimated by Eqs. (S3) and (S4):

$$D_{\text{total}} = D_{29} + 2 \times D_{30} \quad (\text{S3})$$

$$A_{29} = P_{29} - D_{29} \quad (\text{S4})$$

where  $D_{\text{total}}$  and  $A_{29}$  ( $\mu\text{mol}/(\text{kg}\cdot\text{h})$ ) rate the potential rates of denitrification and anammox, respectively.

The potential rate of DNRA was calculated by Eq. (S5):

$$R_{\text{DNRA}} = ([^{15}\text{NH}_4^+]_{\text{Final}} - [^{15}\text{NH}_4^+]_{\text{Initial}}) \times V \times W^{-1} \times T^{-1} \quad (\text{S5})$$

Where  $R_{\text{DNRA}}$  ( $\mu\text{mol}/(\text{kg}\cdot\text{h})$ ) is the measured DNRA rate,  $[^{15}\text{NH}_4^+]_{\text{Final}}$  and  $[^{15}\text{NH}_4^+]_{\text{Initial}}$  ( $\mu\text{mol N/L}$ ) are the measured concentrations of  $^{15}\text{NH}_4^+$  in the final and initial samples of the soil slurries, respectively,  $V$  (L) is the volume of the vial,  $W$  (g) is the dry weight of the soil, and  $T$  (h) is the incubation time.

## **Section S2. Analysis of bacterial community by 454 high-throughput 16S rRNA gene pyrosequencing**

Bacterial 16S rRNA genes for pyrosequencing were amplified by PCR using a 10-nucleotide barcoded forward primer 8F (5'-AGAGTTTGATCCTGGCTCAG-3') and reverse primer 533R (5'-TTACCGCGGCTGCTGGCAC-3'), which targeted the V1–V3 region. The 20  $\mu$ L PCR mixture contained 4  $\mu$ L of 5  $\times$  FastPfu Buffer, 2  $\mu$ L of 2.5 mM dNTPs, 0.4  $\mu$ L of each primer (5 $\mu$ M), 0.5  $\mu$ L of DNA, and 0.4  $\mu$ L FastPfu Polymerase (TransStart FastPfu DNA Polymerase, TransGen, China). The thermocycling steps were as follows: 95  $^{\circ}$ C for 2 min, followed by 25  $^{\circ}$ C cycles at 95  $^{\circ}$ C for 30 s, 55  $^{\circ}$ C for 30 s, 72  $^{\circ}$ C for 30 s and a final extension step at 72  $^{\circ}$ C for 5 min. After purification using the UNIQ-10 PCR Purification Kit (Sangon, Shanghai, China) and quantification using a TBS-380 (Turner BioSystems, Inc., USA), a mixture of amplicons was used for pyrosequencing on a Roche massively parallel 454 GS-FLX Titanium sequencer (Roche 454 Life Sciences, Bran-ford, CT, USA) according to standard protocols. To minimize the effects of random sequencing errors, low-quality sequences were removed by eliminating those without an exact match to the forward primer, without a recognizable reverse primer, of length shorter than 150 nucleotides and containing any ambiguous base calls (Ns). The barcodes and primers were trimmed from the resulting sequences. Finally, a total of 39445 high-quality sequence tags were produced, with an average length of 469 bp per sequence. The operational taxonomic units (OTUs) were clustered with 97% similarity using the MOTHUR program. Rarefaction curves, species richness estimator (Chao1), Shannon diversity index, and Good's coverage were generated in MOTHUR for each sample.

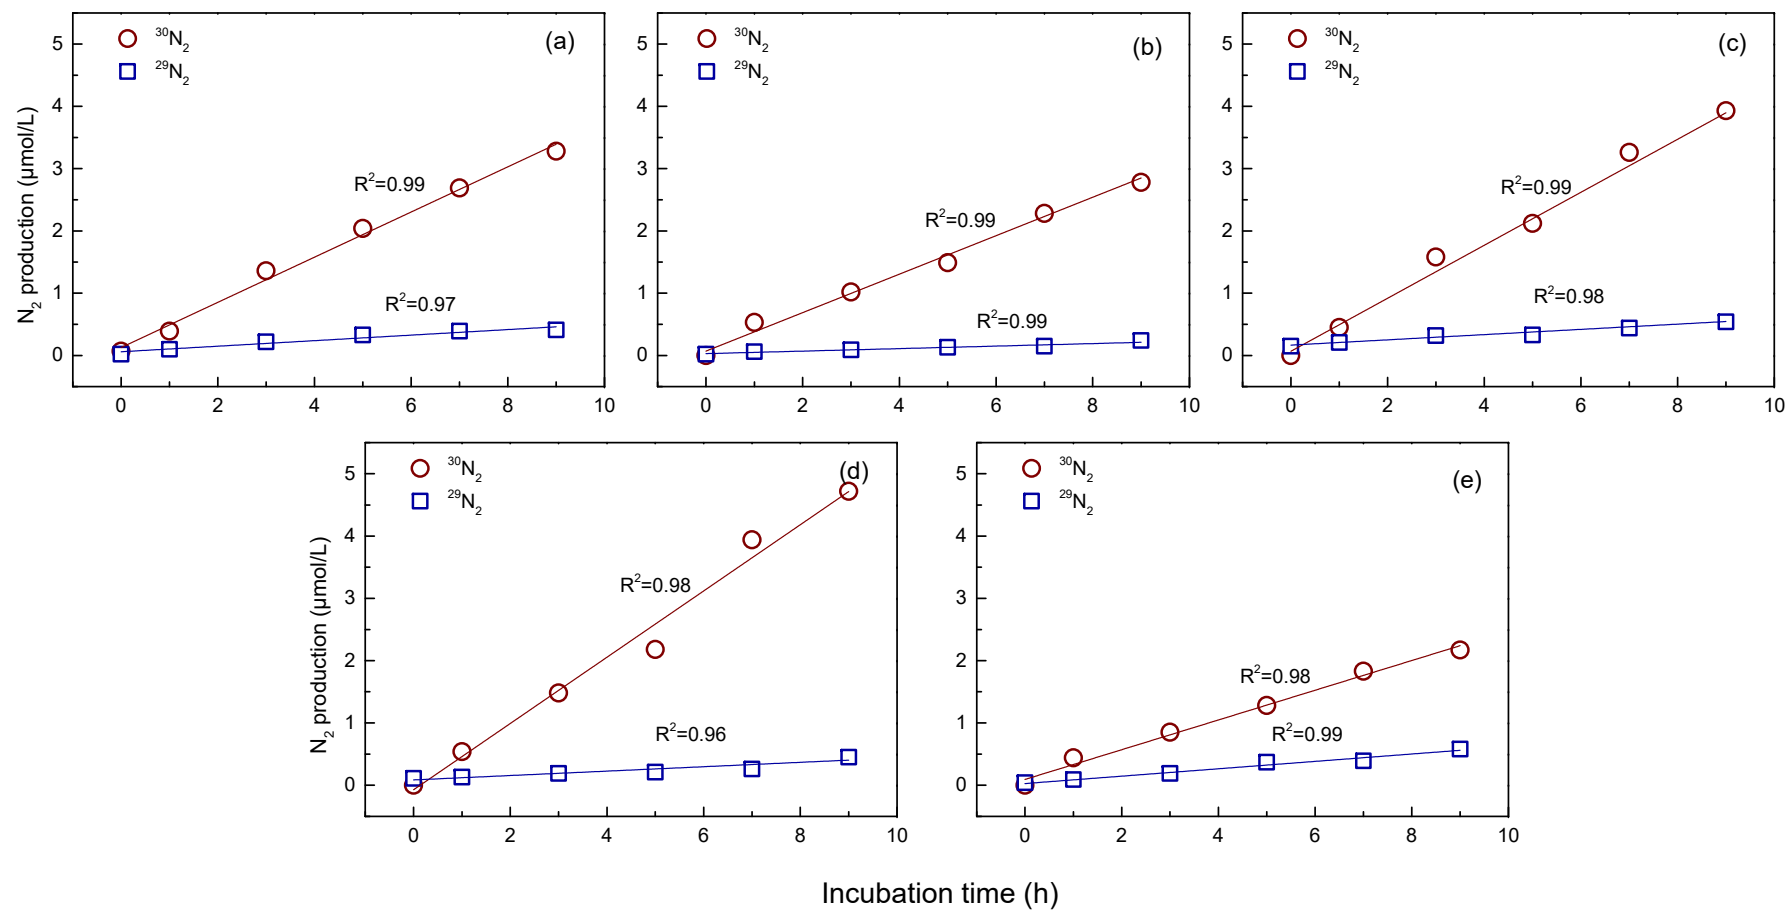

Figure S1 Accumulation of  $^{29}\text{N}_2$  and  $^{30}\text{N}_2$  in soil slurries spiked with  $100\mu\text{M } ^{15}\text{NO}_3^-$  at Sites KC (a), BG (b), SA (c), AC (d), and MF (e). KC, BG, SA, AC, and MF are site abbreviations for *Kandelia candel*, *Bruguiear gymnorrhiza*, *Sonneratia apetala*, *Aegicerar corniculatum*, and mud flats, respectively.
