# Supplementary material for: Effect of Mangrove on Nitrogen Removal in the Intertidal Zone of Shenzhen’s Deep Bay: From 15N Isotope Tracing to Microbial Analysis
Source: MDPI journal article supplement (doi:10.3390/w14213507), 2022-11-02
Supplement: s1 [file s1]

Archive with 1 entries (1 files):
- water-1995379-supplementary.pdf
